# Supplementary material for: Effects of afforestation with Pinus sylvestris var. mongolica plantations combined with enclosure management on soil microbial community
Source: PeerJ journal article supplement (doi:10.7717/peerj.8857), 2020-03-25

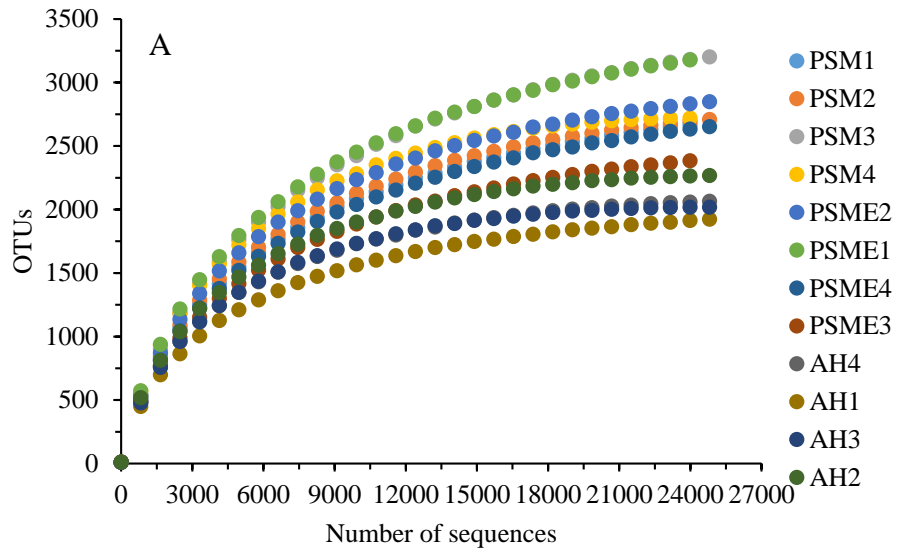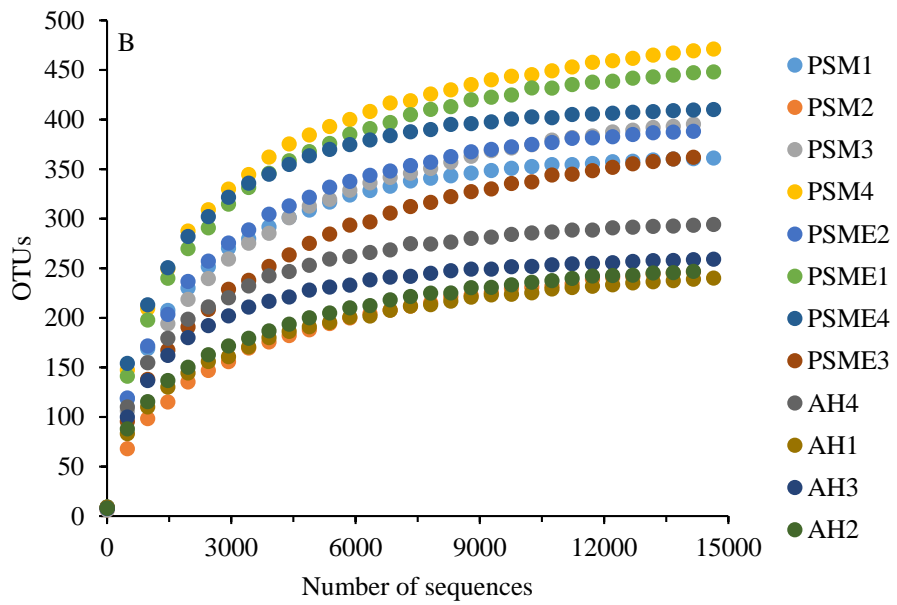

Supplement: Figure_S1.pdf [file Figure_S1.pdf]
